# Supplementary material for: Human Papillomavirus Is Associated With Adenocarcinoma of Lung: A Population-Based Cohort Study
Source: PubMed Central journal article supplement (PMC9279738; doi:10.3389/fmed.2022.932196), 2022-06-30
Supplement: Data_Sheet_1.pdf [file Data_Sheet_1.pdf]

Supplementary Table. Adjusted hazard ratio for all, head &amp; neck, and cervical cancers

|                     |                | Head & Neck Cancer |             |         | Cervical Cancer |             |         |
|---------------------|----------------|--------------------|-------------|---------|-----------------|-------------|---------|
|                     |                | aHR                | 95% CI      | p       | aHR             | 95% CI      | p       |
| <b>HPV</b>          |                | 1.595              | 1.453-1.749 | <.0001* | 2.225           | 2.008-2.464 | <.0001* |
| <b>Gender</b>       | Male vs Female | 5.671              | 4.999-6.434 | <.0001* |                 |             |         |
| <b>Age</b>          |                |                    |             |         |                 |             |         |
|                     | <20            | 0.065              | 0.038-0.109 | <.0001* | 0.028           | 0.016-0.048 | <.0001* |
|                     | 20-40          | Reference          |             |         | Reference       |             |         |
|                     | 40-60          | 4.717              | 4.128-5.391 | <.0001* | 1.124           | 1.001-1.262 | 0.0481* |
|                     | 60-80          | 4.471              | 3.796-5.266 | <.0001* | 1.068           | 0.884-1.291 | 0.4958  |
|                     | >=80           | 3.539              | 2.687-4.662 | <.0001* | 0.956           | 0.633-1.443 | 0.8292  |
| <b>Urbanization</b> |                |                    |             |         |                 |             |         |
|                     | urban 1        | Reference          |             |         | Reference       |             |         |
|                     | 2              | 1.145              | 1.001-1.310 | 0.0481* | 1.004           | 0.872-1.157 | 0.9524  |
|                     | 3              | 1.142              | 0.975-1.338 | 0.1000  | 0.899           | 0.754-1.072 | 0.2357  |
|                     | 4              | 1.251              | 1.051-1.489 | 0.0119* | 1.141           | 0.943-1.379 | 0.1743  |
|                     | 5              | 1.393              | 1.010-1.923 | 0.0435* | 0.729           | 0.450-1.183 | 0.2007  |
|                     | 6              | 1.735              | 1.365-2.206 | <.0001* | 0.907           | 0.641-1.283 | 0.5817  |
|                     | rural 7        | 1.752              | 1.352-2.271 | <.0001* | 0.893           | 0.613-1.299 | 0.5532  |
| <b>Occupation</b>   |                |                    |             |         |                 |             |         |
|                     | Officer        | 0.579              | 0.460-0.730 | <.0001* | 0.72            | 0.565-0.917 | 0.0077* |
|                     | Laborer        | Reference          |             |         | Reference       |             |         |
|                     | Farmer         | 1.239              | 1.066-1.440 | 0.0053* | 1.114           | 0.920-1.349 | 0.2685  |
|                     | Low income     | 1.238              | 0.774-1.980 | 0.3723  | 1.044           | 0.590-1.848 | 0.8825  |
|                     | Unemployed     | 1.082              | 0.954-1.228 | 0.2214  | 1.344           | 1.172-1.542 | <.0001* |
|                     | Others         | 0.92               | 0.608-1.392 | 0.6927  | 0.857           | 0.580-1.266 | 0.4384  |
| <b>Co-morbidity</b> |                |                    |             |         |                 |             |         |

|                         |       |             |         |       |             |         |
|-------------------------|-------|-------------|---------|-------|-------------|---------|
| Ischemic heart disease  | 0.849 | 0.711-1.013 | 0.0693  | 0.796 | 0.591-1.070 | 0.1310  |
| Hypertension            | 1.231 | 1.089-1.392 | 0.0009* | 1.125 | 0.934-1.355 | 0.2140  |
| Hyperlipidemia          | 0.994 | 0.865-1.142 | 0.9326  | 0.808 | 0.651-1.003 | 0.0534  |
| Stroke                  | 0.87  | 0.695-1.090 | 0.2258  | 0.922 | 0.636-1.336 | 0.6668  |
| Diabetes mellitus       | 1.452 | 1.260-1.674 | <.0001* | 1.109 | 0.873-1.410 | 0.3965  |
| Abnormal liver function | 1.72  | 1.504-1.967 | <.0001* | 1.334 | 1.067-1.669 | 0.0116* |
| Peptic ulcer            | 1.153 | 1.005-1.323 | 0.0421* | 1.19  | 0.994-1.425 | 0.0581  |
| GI bleeding             | 1.379 | 0.948-2.008 | 0.0932  | 1.422 | 0.755-2.677 | 0.2754  |
| Renal failure           | 1.163 | 0.704-1.922 | 0.5559  | 2.725 | 1.235-6.009 | 0.013*  |
| Chronic kidney diseases | 0.994 | 0.661-1.495 | 0.9758  | 1.001 | 0.497-2.016 | 0.9984  |
| Gout                    | 0.932 | 0.779-1.115 | 0.4436  | 1.109 | 0.717-1.716 | 0.6411  |
| COPD                    | 1.059 | 0.847-1.324 | 0.6155  | 1.109 | 0.738-1.665 | 0.6193  |

COX Regression. \*p<0.05.

### S1. Cervical can cancer, $P < 0.001$

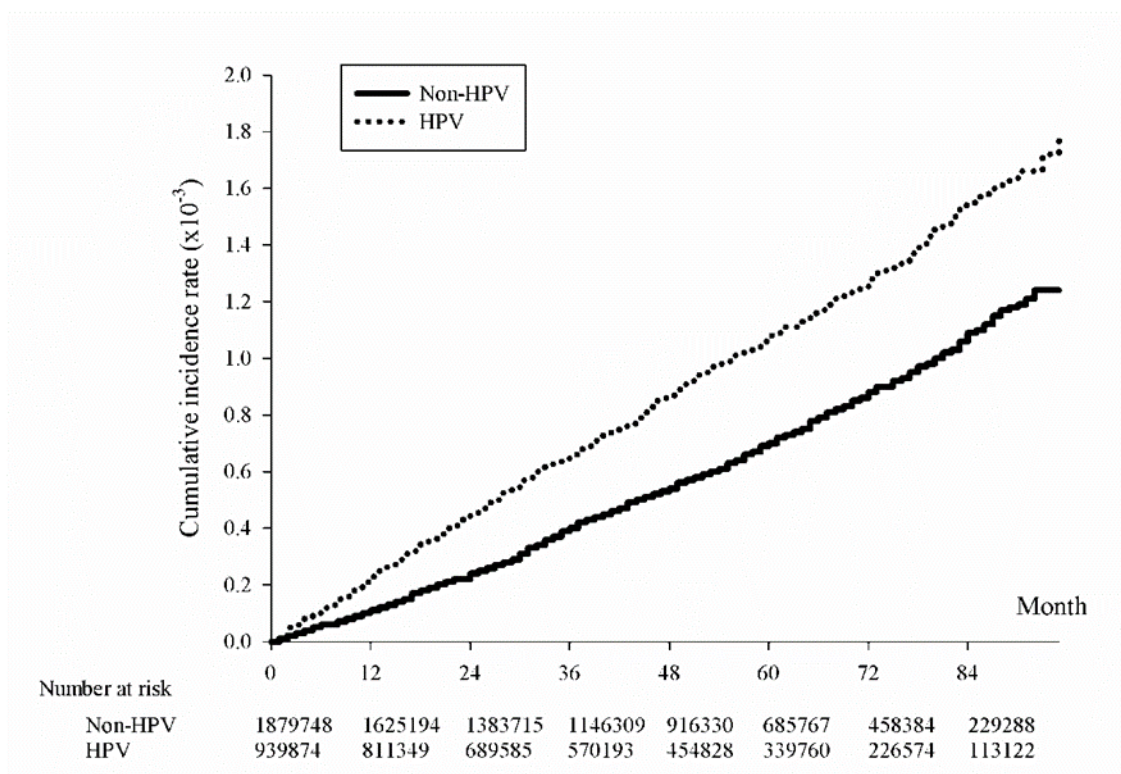

**Supplementary Figure 1. Kaplan-Meier curve of cervical cancer cumulative incidence rates with and without HPV infection**

**S2. Head and neck cancer. P<0.001**

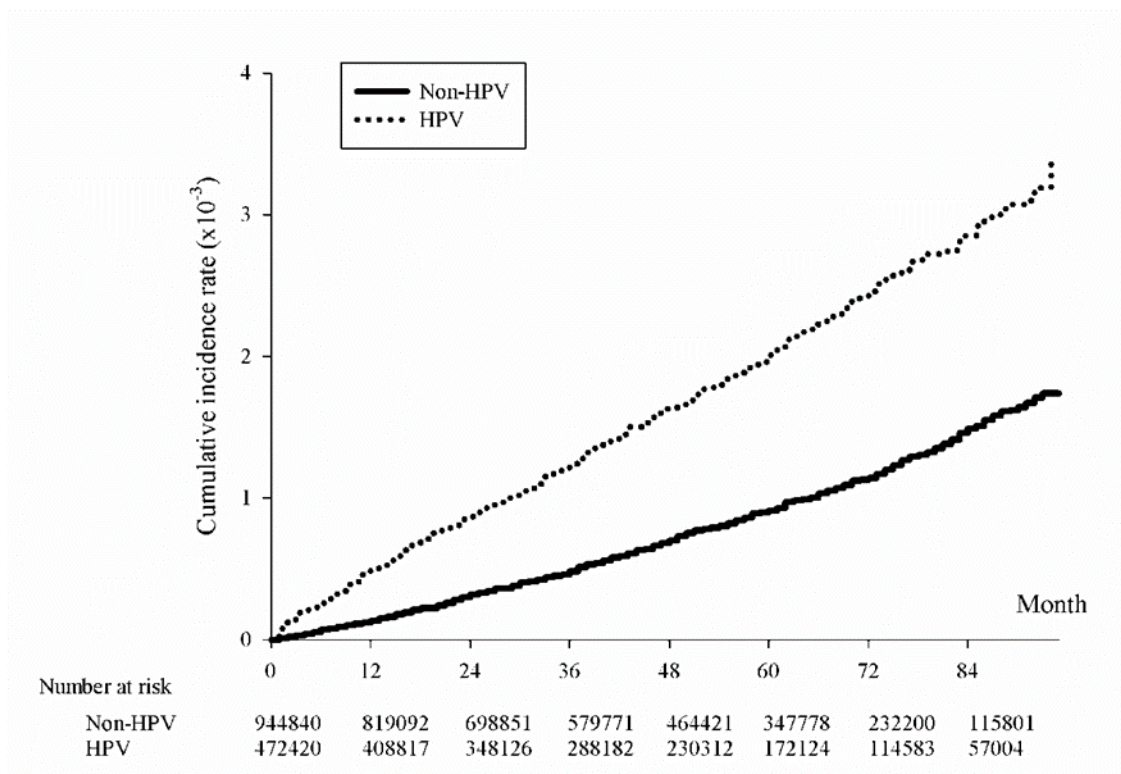

**Supplementary Figure 2. Kaplan-Meier curve of head and neck cancer cumulative incidence rates with and without HPV infection**
